# Supplementary material
Source: MDPI journal article supplement (https://www.mdpi.com/2071-1050/11/23/6659)
Supplement: s1 [file s1]

## Supplementary Figures and Tables

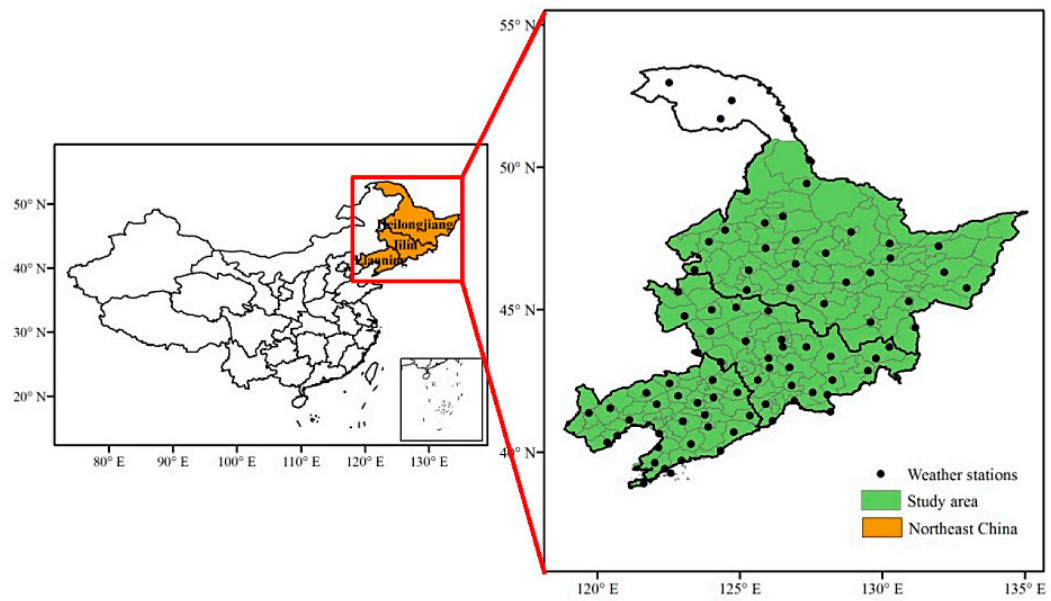

**Figure S1.** Geographical location of study area. Yellow area shows three provinces of Heilongjiang, Jilin and Liaoning in Northeast China. Green area shows the counties where maize was planted. Fine lines are county boundaries. Solid circles show the location of meteorological stations.

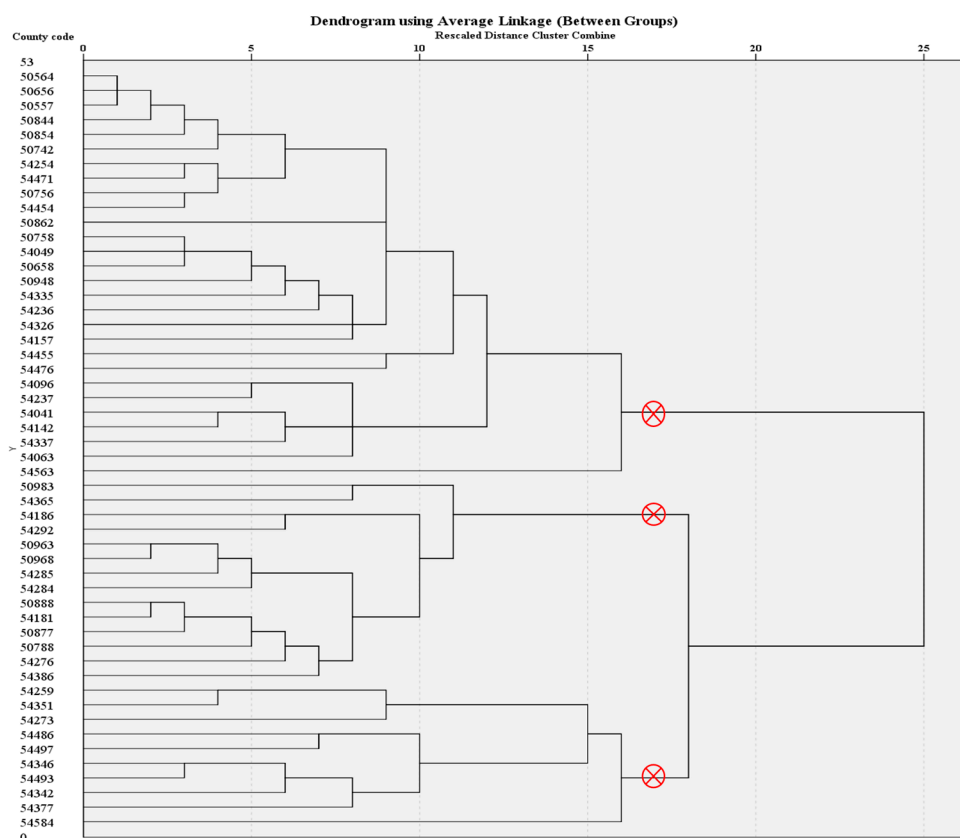

**Figure S2.** Dendrogram of hierarchical cluster analysis. x-axis is the rescaled distance cluster combine, and y-axis is the county code. The red marks show the three clusters. Variables using in the hierarchical cluster analysis are a set of correlation coefficients between the yield change ( $\Delta$ yield %) and the changes in climate variable ( $\Delta X$ ) for each county. The X includes Tmax, Tmin, Pre and SH during entire growing season, and Tmax\_v, Tmin\_v, Pre\_v, SH\_v, Tmax\_r, Tmin\_r, Pre\_r and SH\_r in the time window of V&R phases.

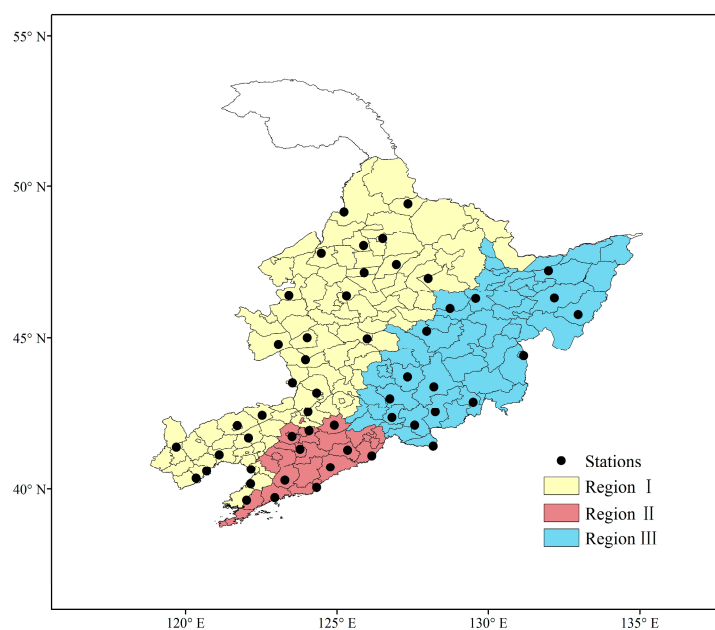

**Figure S3.** Three regions were oriented in light of the hierarchical cluster analysis in Figure A2.

**Phenological date of maize.** We obtained phenological data of maize from 12 Agro-meteorological Experimental Stations (AESs) located at NSC. These stations are operated by the Chinese Meteorological Administration. Table A1 shows the basic information about the 12 agrometeorological stations. Table A2 shows the descriptive statistics for the observed date (mm/dd) of sowing, tasseling and maturity at 12 AESs in NEC.

**Table S1.** Information about the period of observation and the number of cultivars planted at 12 agrometeorological stations in NEC.

| Province     | Station  | Latitude | Longitude | Period of observation | Number of cultivars |
|--------------|----------|----------|-----------|-----------------------|---------------------|
| Heilongjiang | Hailun   | 47°27'N  | 126°58'E  | 1981–2005             | 6                   |
|              | Harbin   | 45°56'N  | 126°34'E  | 1984–2005             | 6                   |
| Jilin        | Wuchang  | 44°54'N  | 127°09'E  | 1983–2005             | 11                  |
|              | Meihekou | 42°32'N  | 125°38'E  | 1981–2005             | 7                   |
|              | Yushu    | 44°50'N  | 126°32'E  | 1985–2005             | 9                   |
|              | Shulan   | 44°25'N  | 126°56'E  | 1990–2005             | 4                   |
|              | Tonghua  | 41°40'N  | 125°45'E  | 1981–2005             | 3                   |
|              | Yongji   | 43°42'N  | 126°31'E  | 1990–2005             | 8                   |
| Liaoning     | Haicheng | 40°53'N  | 122°43'E  | 1990–2005             | 7                   |
|              | Benxi    | 41°18'N  | 124°17'E  | 1981–2005             | 10                  |
|              | Changtu  | 42°47'N  | 124°07'E  | 1990–2005             | 11                  |
|              | Dengta   | 41°25'N  | 123°12'E  | 1990–2005             | 10                  |

**Table S2.** Descriptive statistics for the observed date (mm/dd) of sowing, tasseling and maturity at 12 agrometeorological stations in NEC.

| Item                              | Sowing       | Tasseling    | Maturity     |
|-----------------------------------|--------------|--------------|--------------|
| N of cases                        | 146          | 245          | 241          |
| Minimum                           | 04/16        | 07/10        | 08/29        |
| Maximum                           | 05/19        | 08/05        | 10/11        |
| <b>Median</b>                     | <b>04/28</b> | <b>07/23</b> | <b>09/18</b> |
| <b>Arithmetic Mean</b>            | <b>04/28</b> | <b>07/22</b> | <b>09/18</b> |
| <b>95% LCL of Arithmetic Mean</b> | <b>04/27</b> | <b>07/21</b> | <b>09/17</b> |
| <b>95% UCL of Arithmetic Mean</b> | <b>04/29</b> | <b>07/22</b> | <b>09/19</b> |
